# Supplementary material
Source: PubMed Central journal article supplement (PMC2831154)
Supplement: NIHMS172202-supplement-1_si_001.pdf [file NIHMS172202-supplement-1_si_001.pdf]

**Small Molecular, Macromolecular and Cellular Chloramines React with Thiocyanate to Give  
the Human Defense Factor Hypothiocyanite**

Bheki A. Xulu and Michael T. Ashby\*

*Department of Chemistry and Biochemistry, University of Oklahoma,  
620 Parrington Oval, Norman, OK 73019*

Submitted to *Biochemistry*. December 6, 2009, E-mail: mashby@ou.edu

**SUPPORTING INFORMATION**

|                                                                                                                                                                                                                          |    |
|--------------------------------------------------------------------------------------------------------------------------------------------------------------------------------------------------------------------------|----|
| <b>Mathematica code used to fit the data of Figure 3</b> .....                                                                                                                                                           | 3  |
| <b>Figure S1.</b> Percent yield of OSCN <sup>-</sup> for TauCl (80 μM) oxidation as a function of [SCN <sup>-</sup> ] (0.5 – 5.0 mM) .....                                                                               | 4  |
| <b>Figure S2.</b> Kinetic trace for the pseudo-first-order reaction of TauCl (0.5 mM)<br>with SCN <sup>-</sup> (5 mM) .....                                                                                              | 5  |
| <b>Figure S3.</b> Kinetic trace for the pseudo-first-order reaction of TauCl (208 μM)<br>with TNB (16 μM) .....                                                                                                          | 6  |
| <b>Figure S4.</b> Kinetic trace for the pseudo-first-order reaction of OSCN <sup>-</sup> (4 μM, produced<br>by the LPO-catalyzed oxidation of SCN <sup>-</sup> by H <sub>2</sub> O <sub>2</sub> ) with TNB (56 μM) ..... | 7  |
| <b>Figure S5.</b> Kinetic trace for the pseudo-first-order reaction of OSCN <sup>-</sup> (5.5 μM, produced by<br>the uncatalyzed oxidation of SCN <sup>-</sup> by TauCl) with TNB (56 μM) .....                          | 8  |
| <b>Figure S6.</b> Kinetic trace for the pseudo-first-order reaction of Ub*Cl (6 μM) with<br>TNB (68 μM) .....                                                                                                            | 9  |
| <b>Figure S7.</b> Kinetic trace for the pseudo-first-order reaction of OSCN <sup>-</sup> (produced by the reaction<br>of Ub*Cl (6.75 μM) with SCN <sup>-</sup> (0.5 mM) for 20 minutes) with TNB (58.66 μM) .....        | 10 |
| <b>Figure S8.</b> Kinetic trace for the pseudo-first-order reaction of Chlorinated <i>E. Coli</i> (6 μM) with<br>TNB (60.8 μM) .....                                                                                     | 11 |
| <b>Figure S9.</b> Kinetic trace for the pseudo-first-order reaction of OSCN <sup>-</sup> (produced by the reaction                                                                                                       |    |

of chlorinated *E. Coli* (6  $\mu\text{M}$ ) with  $\text{SCN}^-$  (2.5 mM) for 12 minutes)

with TNB (60.8  $\mu\text{M}$ ) ..... 12

### Mathematica code used to fit the data of Figure 3.

```
Do[
  Clear[h, nsteps, TauCI, SCN, OSCN, Prod, k1, k2, data];

  SCN = 0.01;
  totaltime = 5;
  h = 0.01;
  nsteps = Round[totaltime/h];
  k1 = 100;
  k2 = 5000;
  TauCI[0] = TauCIZero;
  OSCN[0] = 0;
  Prod[0] = 0;

  Do[
    {
      TauCI[n] = TauCI[n - 1] - h*k1*TauCI[n - 1]*SCN,
      OSCN[n] = OSCN[n - 1] + h*k1*TauCI[n - 1]*SCN - h*k2*TauCI[n - 1]*OSCN[n - 1],
      Prod[n] = Prod[n - 1] + h*k2*TauCI[n - 1]*OSCN[n - 1]
    },
    {n, 1, nsteps, 1} // N;

  data = Table[{TauCI[n], OSCN[n], Prod[n]}, {n, 0, nsteps}];

  (* Include the following to plot concentration vs. time

  TableForm[data];
  datatr=Transpose[data];
  TauCI=ListPlot[datatr[[1]], DisplayFunction -> \
Identity,PlotStyle->Red]
  OSCN=ListPlot[datatr[[2]], DisplayFunction -> \
Identity,PlotStyle->Blue]
  Prod=ListPlot[datatr[[3]], DisplayFunction -> \
Identity,PlotStyle->Green]

  Show[{ TauCI, OSCN, Prod}, DisplayFunction -> $DisplayFunction]
  *)

  Print["[TauCI]0 = ", TauCIZero];
  Print["Final Concentration OSCN = ", OSCN[nsteps - 1]];
  Print["Percent Yield = ", 100*OSCN[nsteps - 1]/TauCIZero];
  Print["+++++++"],

{TauCIZero, 0.00025, 0.002, 0.00005}]
```

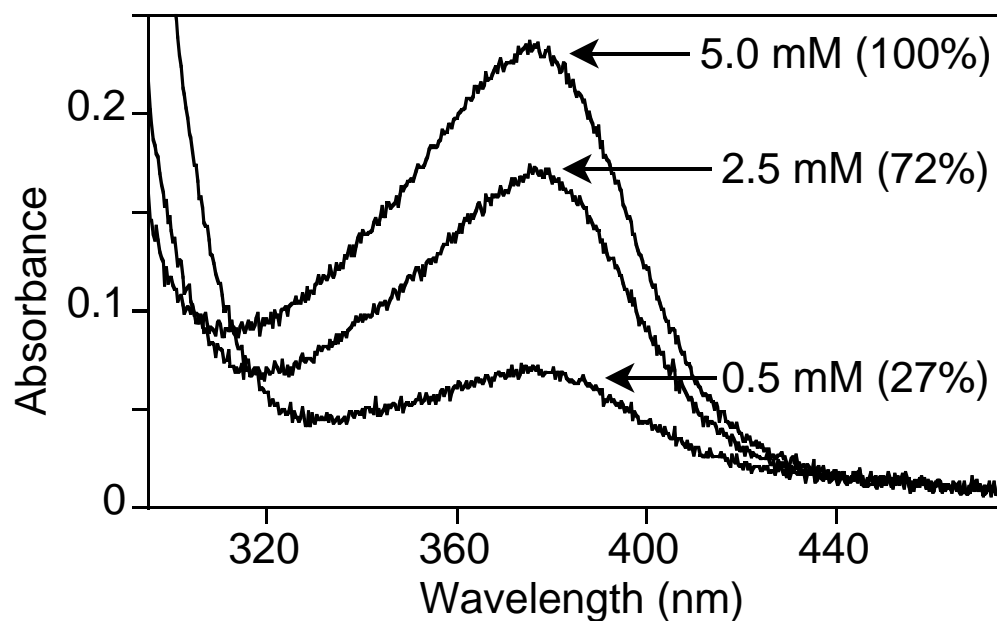

**Figure S1.** UV-vis spectra obtained for the reactions of TauCl (80  $\mu$ M) with SCN<sup>-</sup> (0.5-5.0 mM) in phosphate buffer (100 mM, pH 7.4). The spectra were recorded with a 1 meter fiber optic cell. The chemical yield of OSCN<sup>-</sup> is indicated versus [SCN<sup>-</sup>]<sub>0</sub>.

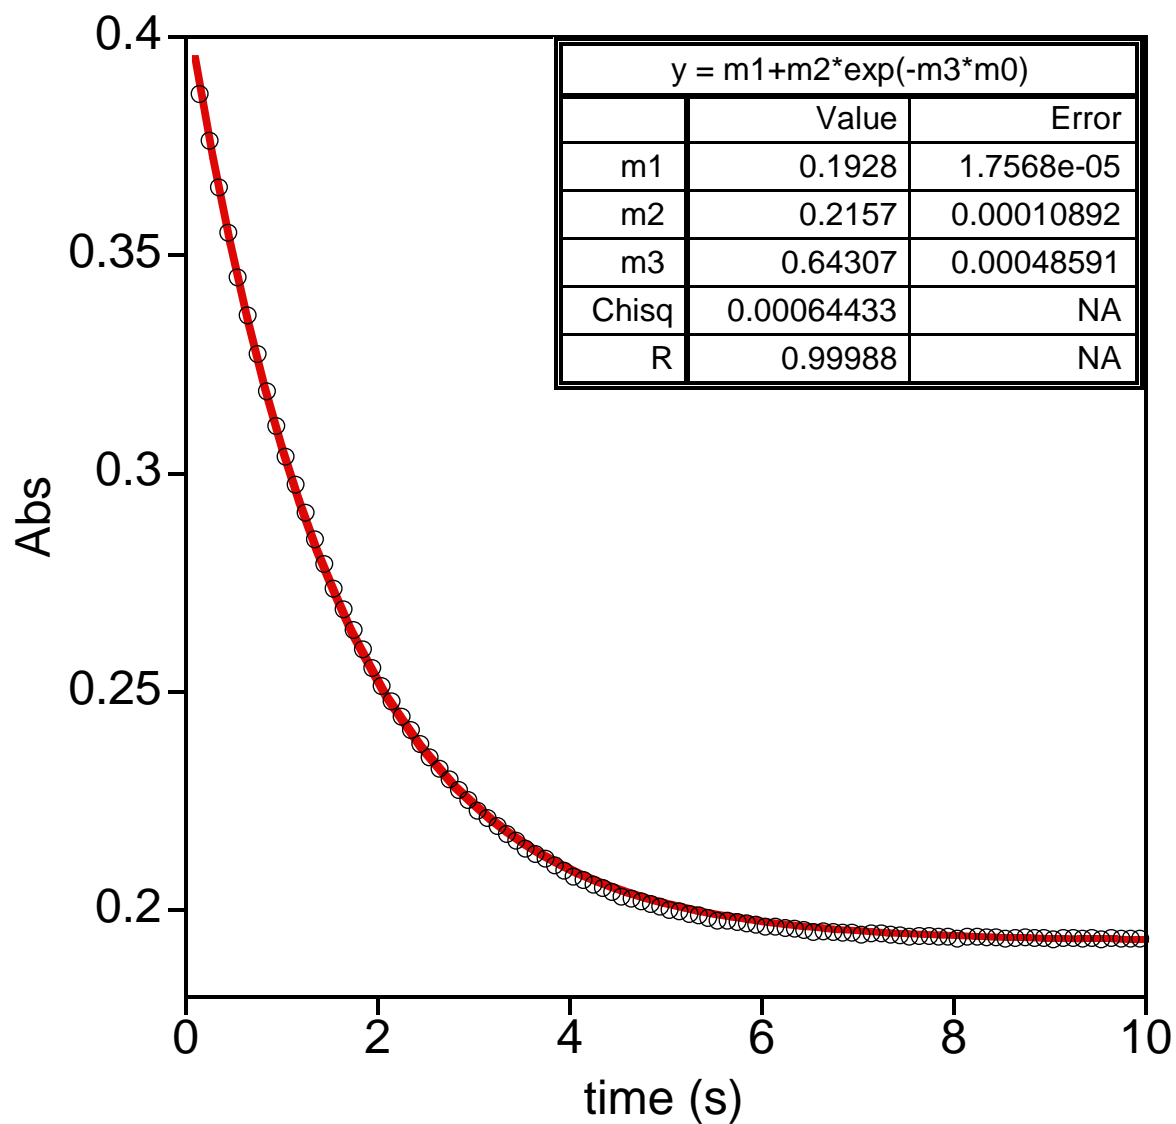

**Figure S2.** Observed absorbance decrease at 250 nm for the reaction of TauCl (0.5 mM) with  $\text{SCN}^-$  (5 mM) at pH 7.4 and  $I = 1.0$  M. A first-order fit (red) and 10% of the data (black circles) are illustrated.

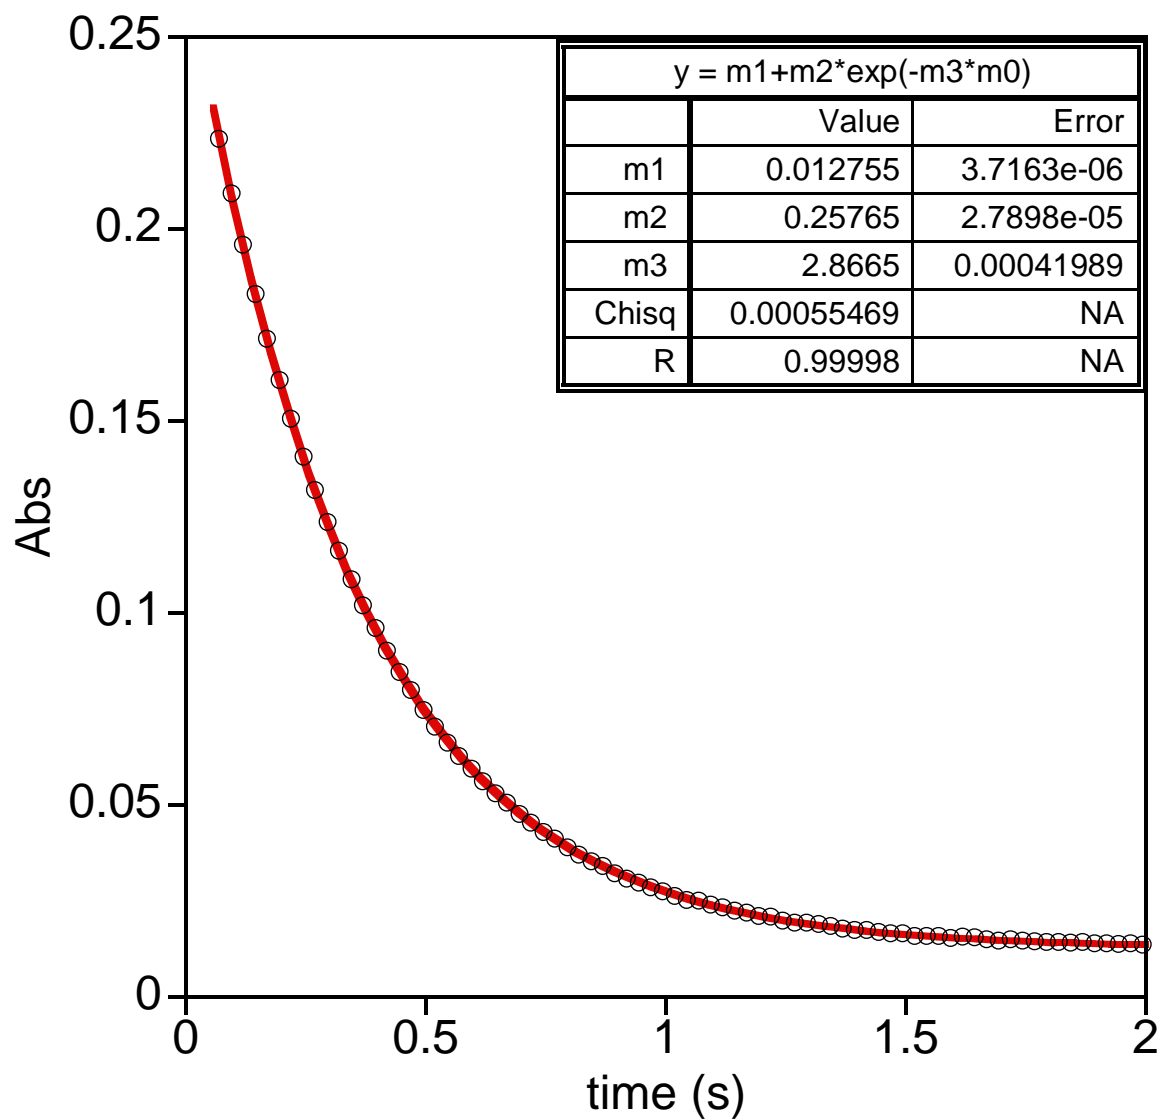

**Figure S3.** Observed absorbance decrease at 412 nm for the reaction of TauCl (208  $\mu\text{M}$ ) with TNB (16  $\mu\text{M}$ ) at pH 7.4 and  $I = 1.0 \text{ M}$ . A first-order fit (red) and 2% of the data (black circles) are illustrated.

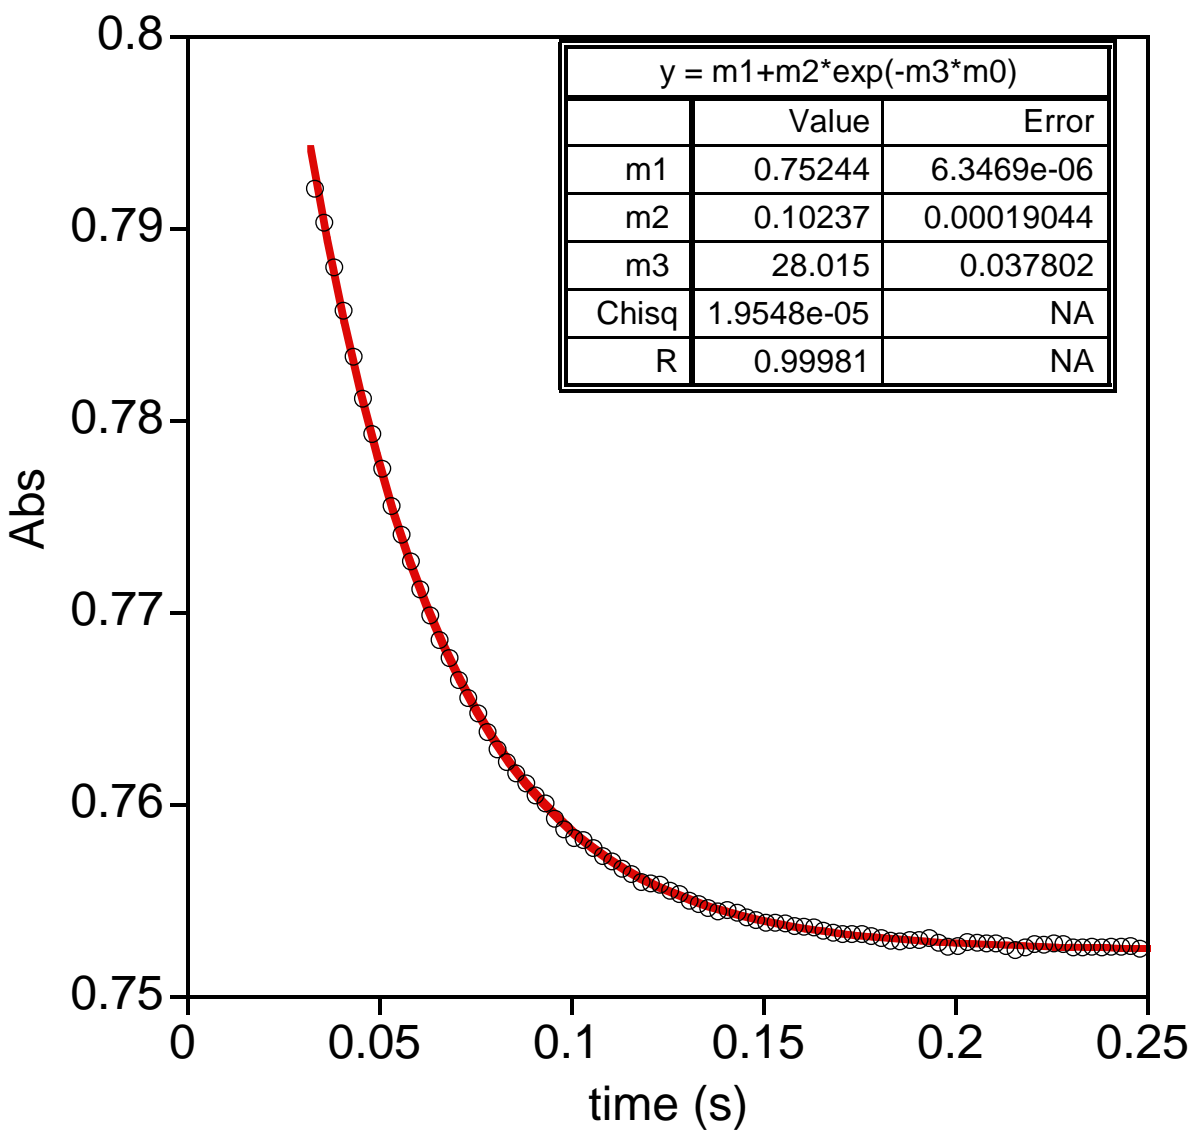

**Figure S4.** Observed absorbance decrease at 412 nm for the reaction of  $\text{OSCN}^-$  ( $4 \mu\text{M}$ , produced by the LPO-catalyzed oxidation of  $\text{SCN}^-$  by  $\text{H}_2\text{O}_2$ ) with TNB ( $56 \mu\text{M}$ ) at pH 7.4 and  $I = 1.0 \text{ M}$ . A first-order fit (red) and 20% of the data (black circles) are illustrated.

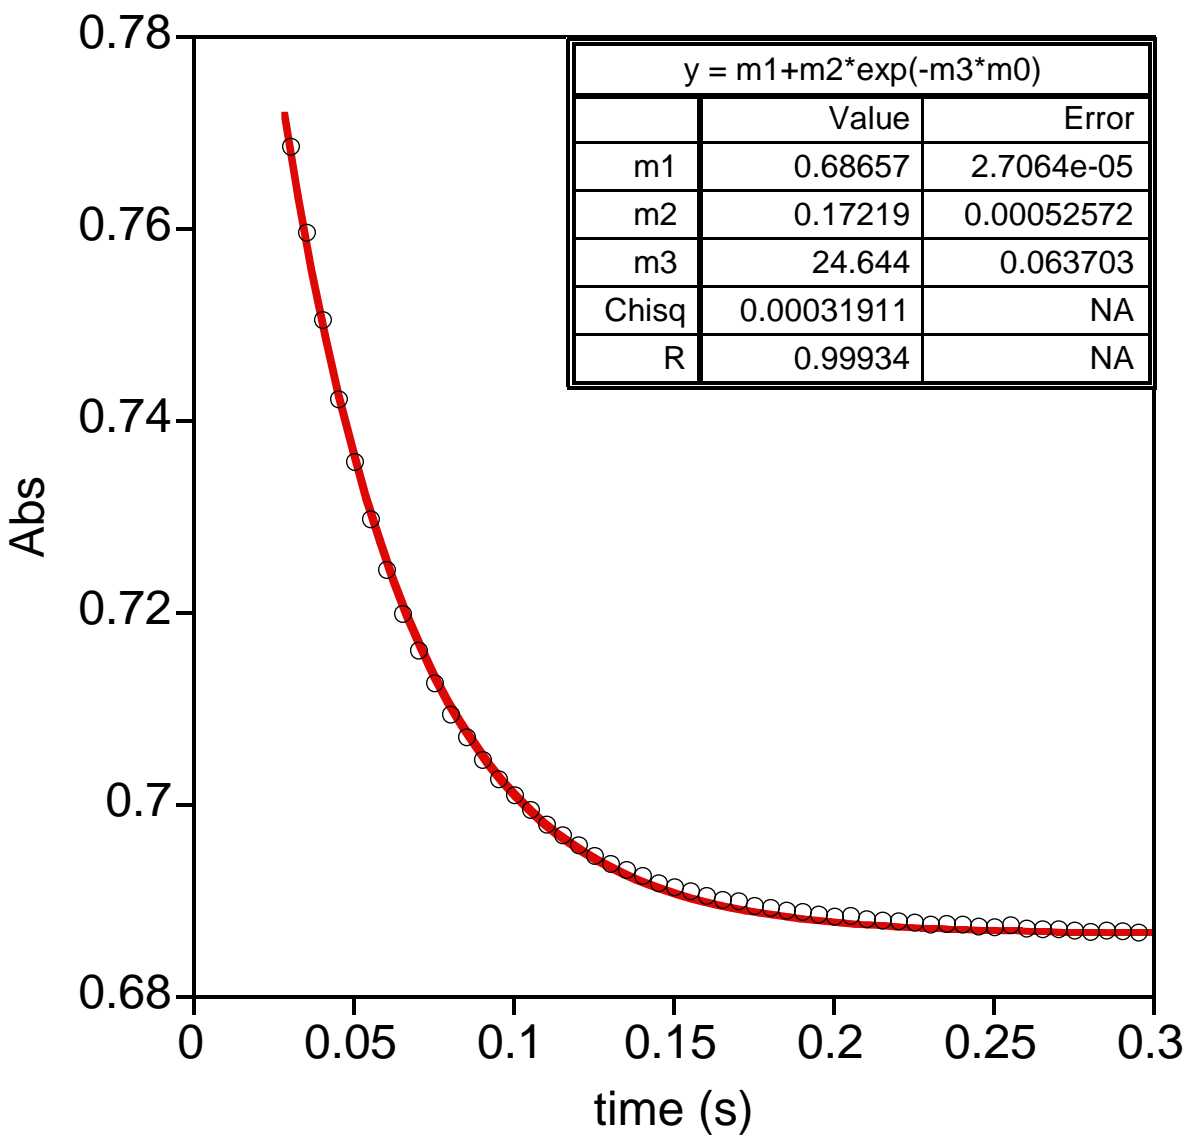

**Figure S5.** Observed absorbance decrease at 412 nm for the reaction of  $\text{OSCN}^-$  ( $5.5 \mu\text{M}$ , produced by the uncatalyzed oxidation of  $\text{SCN}^-$  by  $\text{TauCl}$ ) with TNB ( $56 \mu\text{M}$ ) at pH 7.4 and  $I = 1.0 \text{ M}$ . A first-order fit (red) and 10% of the data (black circles) are illustrated.



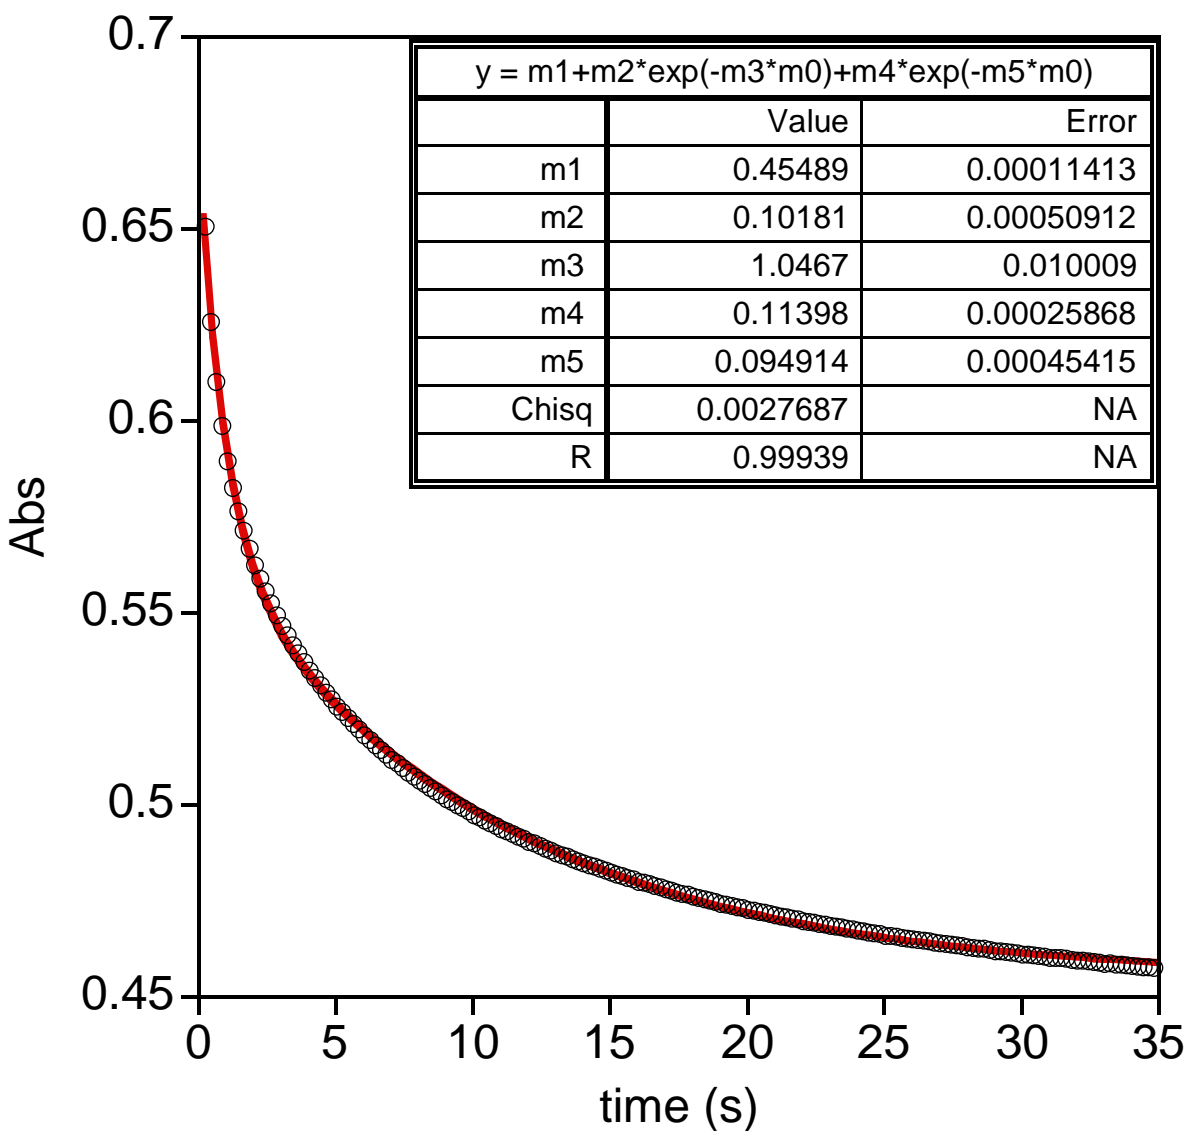

**Figure S6.** Observed biexponential (decrease-decrease) absorbance decrease at 412 nm for the reaction of Ub\*Cl (6  $\mu$ M, based upon the amount of HOCl used) with TNB (68  $\mu$ M) at pH 7.4 and I = 1.0 M. A biexponential fit (red) and 10% of the data (black circles) are illustrated.

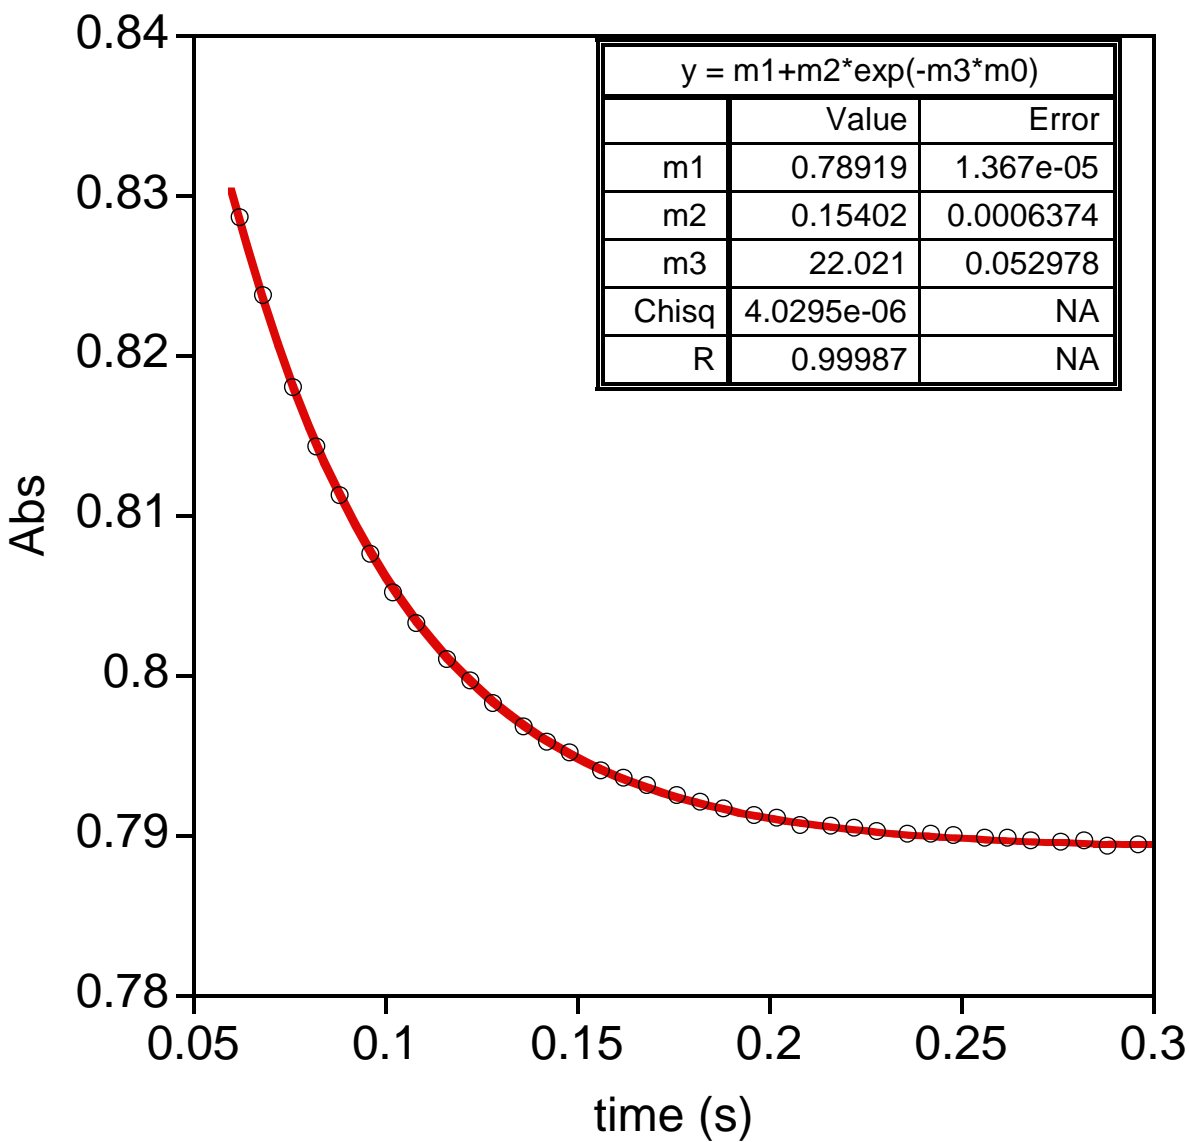

**Figure S7.** Observed absorbance decrease at 412 nm for the reaction of Ub\*Cl (6.75  $\mu\text{M}$ ) with  $\text{SCN}^-$  (0.5 mM) for 20 minutes, followed by reaction with TNB (58.66  $\mu\text{M}$ ) at pH 7.4 and  $I = 1.0 \text{ M}$ . A first-order fit (red) and 10% of the data (black circles) are illustrated.

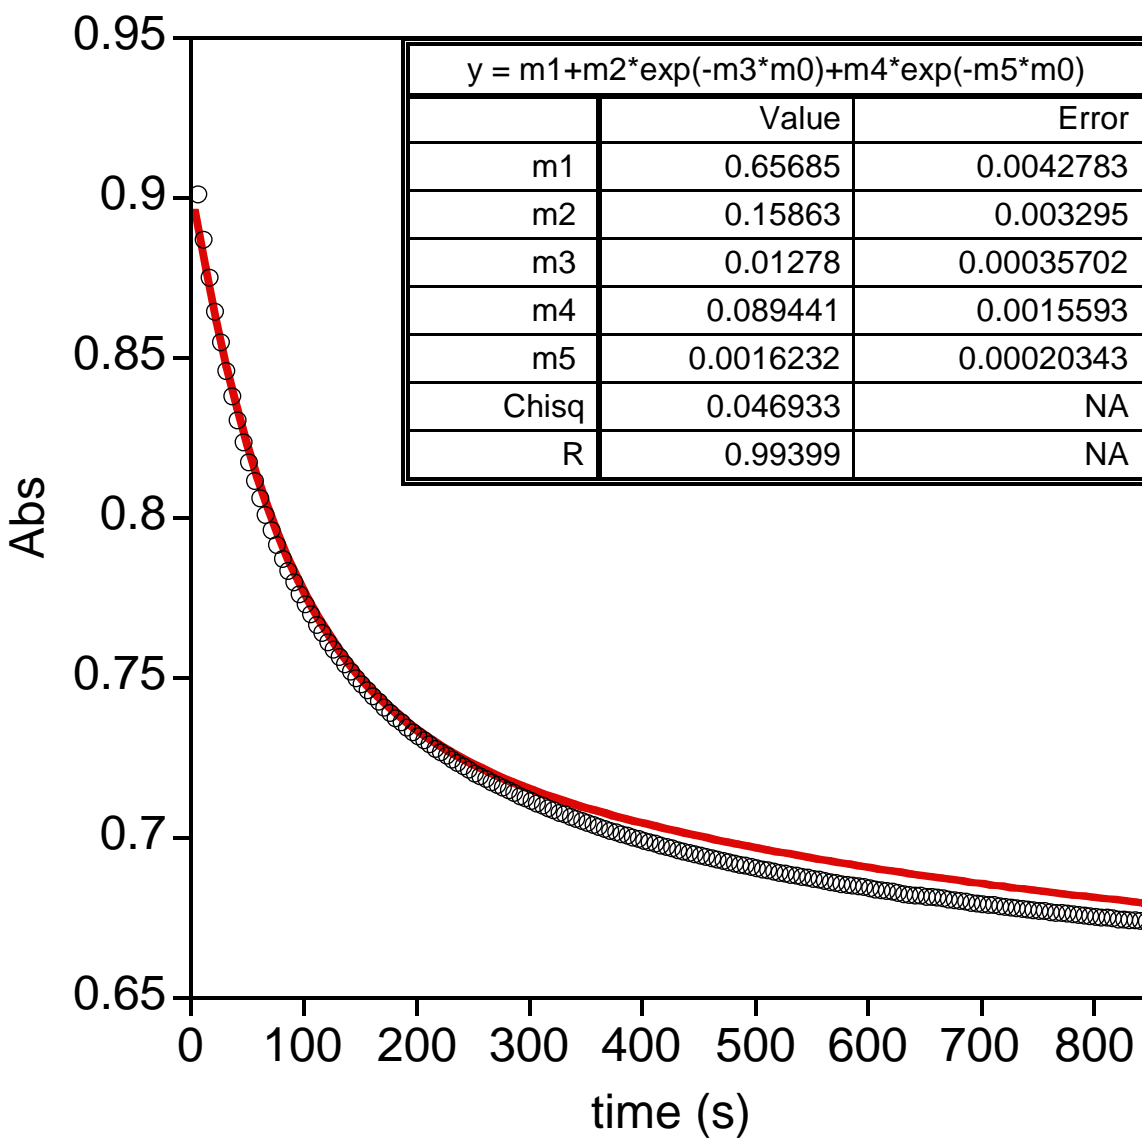

**Figure S8.** Absorbance decrease at 412 nm for the reaction of chlorinated *E. coli* (6  $\mu\text{M}$ , based upon the HOCl used) with TNB (60.8  $\mu\text{M}$ ) at pH 7.4 and  $I = 1.0 \text{ M}$ . A biexponential fit (red) and 10% of the data (black circles) are illustrated. The kinetic trace is apparently multi-phasic.

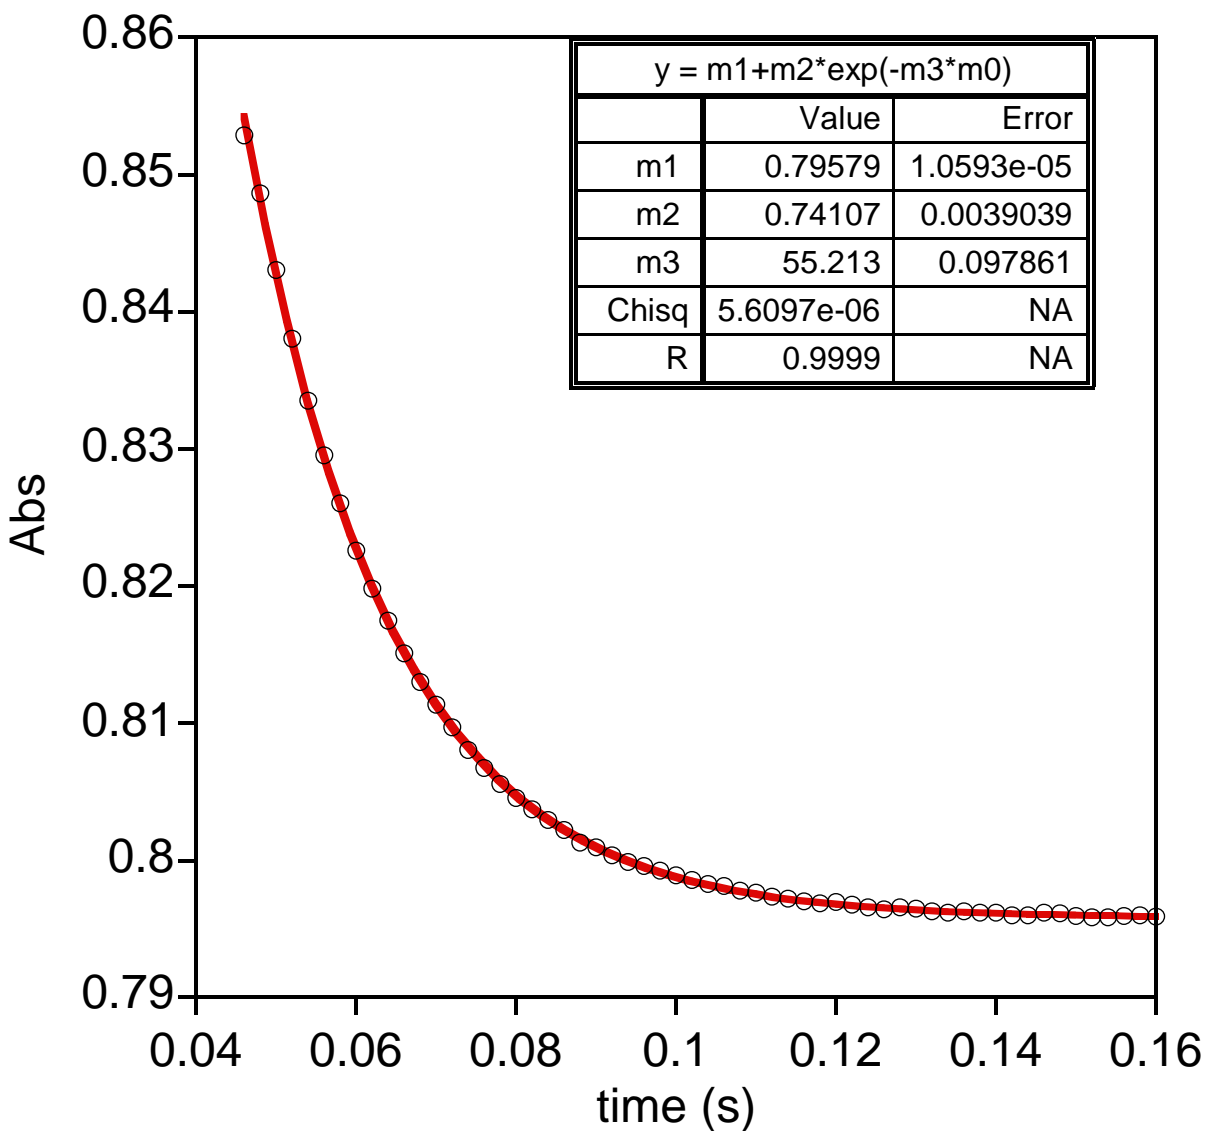

**Figure S9.** Observed absorbance decrease at 412 nm for the reaction of chlorinated *E. coli* (6  $\mu\text{M}$ , based upon the HOCl used) with  $\text{SCN}^-$  (2.5 mM) for 12 minutes, followed by reaction with TNB (58.66  $\mu\text{M}$ ) at pH 7.4 and  $I = 1.0$  M. A first-order fit (red) and 50% of the data (black circles) are illustrated.
